# Supplementary material for: Artificial Intelligence for Body Composition Assessment Focusing on Sarcopenia
Source: Research Square preprint supplement (doi:10.21203/rs.3.rs-5041185/v1), 2024-11-13
Supplement: Supplementary file 1 [file 307a132924a72b8bb8578cf3.docx]

Table 1. Patient characteristics

| Variable |  |  |
| --- | --- | --- |
| gender, n (%) | Male | 2152 (69.5) |
|  | Female | 944 (30.5) |
| Age, years, Median (range) |  | 68 (27-92) |
| underlying medical condition, n (%) | early esophageal cancer | 334 (10.8) |
|  | early gastric cancer | 822 (26.6) |
|  | early colorectal cancer | 323 (10.4) |
|  | advanced esophageal cancer | 1291 (41.7) |
|  | advanced colorectal cancer | 326 (10.5) |

Table 2. Diagnostic reproducibility using conventional methods (manual segmentation) for each cohort.

| test cohort | | SMI(1) | | | |
| --- | --- | --- | --- | --- | --- |
| low | middle | high | total |
| SMI(2) | low | 29 | 10 | 9 | 48 |
| middle | 5 | 4 | 9 | 18 |
| high | 1 | 2 | 45 | 48 |
| total | 35 | 16 | 63 | 114 |

| validation cohort | | SMI(1) | | | |
| --- | --- | --- | --- | --- | --- |
| low | middle | high | total |
| SMI(2) | low | 29 | 13 | 21 | 63 |
| middle | 1 | 0 | 26 | 27 |
| high | 0 | 1 | 27 | 28 |
| total | 30 | 14 | 74 | 118 |

|  | *κ* value | 95%CI |
| --- | --- | --- |
| test cohort | 0.47 | 0.354-0.601 |
| validation cohort | 0.236 | 0.143-0.330 |

SMI(1) represents the first measurement and SMI(2) represents the second measurement.

Abbreviations: SMI, Skeletal Muscle Index; CI, confidence interval

Table 3. Characteristics of patients with BMI_AI in each cohort.

|  |  | train |  | validation |
| --- | --- | --- | --- | --- |
| N |  | 860 |  | 140 |
| Gender, n | Male | 459 |  | 82 |
|  | Female | 401 |  | 58 |
| Age, years | Median (range) | 65 (27-93) |  | 63 (40-90) |
| Height, m | level Mean (SD) | 1.62 (0.08) |  | 1.63 (0.09) |
| Weight, kg | level Mean (SD) | 59.6 (11.5) |  | 59.1 (11.3) |
| BMI, kg/m2 | level Mean (SD) | 23.7 (35.1) |  | 22.2 (3.4) |
| Alb, g/dl | level Mean (SD) | 4.21 (0.40) |  | 4.22 (0.43) |
| T-chol, mg/dl | level Mean (SD) | 201.8 (36.2) |  | 200.8 (34.9) |

NOTE: Classification of early and advanced cancers is based on the Japanese Classification of Carcinomas”.

**Abbreviations**: BMI, Body Mass Index; Alb, albumin; T-chol, Total cholesterol; SD, standard deviation.

Table 4 Diagnostic performance of BMI_AI and Sarcopenia_AI.

|  | Sensitiveity | Specificity | PPV | NPV | Accuracy |
| --- | --- | --- | --- | --- | --- |
|  | 95%CI | 95%CI | 95%CI | 95%CI | 95%CI |
| BMI_AI | 0.96 | 0.862 | 0.889 | 0.949 | 0.914 |
|  | 0.88-0.99 | 0.753-0.935 | 0.800-0.948 | 0.859-0.989 | 0.855-0.955 |
| Sarcopenia_AI |  |  |  |  |  |
|  | 0.823 | 0.981 | 0.981 | 0.823 | 0.895 |
|  | 0.705-0.908 | 0.897-1.00 | 0.897-1.00 | 0.705-0.908 | 0.823-0.944 |

**Abbreviations**: CI, confidence interval; PPV, positive predictive value; NPV, negative predictive value

Table5 Characteristics of patients with sarcopenia_AI in each cohort.

|  |  | train | validation | test |
| --- | --- | --- | --- | --- |
| N |  | 1864 | 118 | 114 |
| Gender, n | Male | 1415 | 98 | 97 |
|  | Female | 449 | 20 | 17 |
| Age, years | Median (range) | 66 (44-86) | 68 (27-92) | 68 (41-86) |
| Height, m | level Mean (SD) | 1.63 (0.08) | 1.64 (0.08) | 1.63 (0.07) |
| Weight, kg | level Mean (SD) | 57.6 (10.6) | 56.3 (9.7) | 56.5 (9.8) |
| BMI, kg/m2 | level Mean (SD) | 21.5 (3.3) | 20.9 (2.8) | 21.4 (2.9) |
| VFM, cm2 | level Mean (SD) | 91.9 (58.3) | 79.3 (45.7) | 77.7 (62.1) |
| SFM, cm2 | level Mean (SD) | 92.2 (60.2) | 117.3 (41.2) | 113.9 (34.6) |
| SMA, cm2 | level Mean (SD) | 111.7 (27.0) | 87.1 (50.7) | 88.2 (60.7) |
| SMI, cm2/m2 | level Mean (SD) | 41.6 (8.8) | 44.9 (8.9) | 44.7 (9.8) |
| muscle class, n | low | 649 | 30 | 36 |
|  | middle | 366 | 14 | 16 |
|  | high | 849 | 74 | 62 |
| Alb, g/dl | level Mean (SD) | 4.06 (0.44) | 4.05 (0.45) | 4.02 (0.47) |
| T-chol, mg/dl | level Mean (SD) | 198.4 (106.7) | 195.0 (41.5) | 192 (51) |
| TG, mg/dl | level Mean (SD) | 140.7 (102.2) | 188.1 (188.4) | 175.9 (104.3) |

**NOTE**: The classification of early and advanced cancer was based on “Japanese Classification of Carcinoma”.

"Muscle class" refers to the classification of SMI as low for SMI < 38, middle for 38 ≤ SMI < 42, and high for SMI ≥ 42.

**Abbreviations**: BMI, Body Mass Index; VFM, Visceral Fat Mass; SFM, subcutaneous fat mass; SMA, Skeletal Muscle Area; SMI, Skeletal Muscle Index; Alb, albumin; T-chol, Total cholesterol; TG, triglyceride; SD, standard deviation.
